# Supplementary material for: Identification of polymorphisms in TYRP1, DCT and RAB38 genes and their association with coat color in alpacas
Source: Frontiers journal article supplement (doi:10.3389/fanim.2023.1236582), 2023-12-04
Supplement: Table_1.DOCX [file Table_1.DOCX]

Supplementary Material

Identification of polymorphisms in TYRP1, DCT and RAB38 genes and their association with coat color in alpacas

Carola Melo1*, Walter Bravo1, Cesar Amath1, Celso Zapata,2

1 Laboratorio de Genética. Escuela Profesional de Medicina Veterinaria Canchis. Universidad San Antonio Abad del Cusco. Cusco-Perú.

2Facultad de Medicina Veterinaria y Zootecnia. Universidad Nacional del Altiplano

*** Correspondence:**Corresponding Author
[carola.melo@unsaac.edu.pe](mailto:carola.melo@unsaac.edu.pe)

**Supplementary Materials**- Table 1S. Additional information about samples used in this study.

| **Sample ID** | **Coat color** | **Farmer** |
| --- | --- | --- |
| RJ1034 | White | Oquemarca |
| 0072 | White | Oquemarca |
| Nina 657 | White | Oquemarca |
| 68 1738 | White | Oquemarca |
| 042-15 MD | White | Chaupiwasi |
| 5608 MD | White | Chaupiwasi |
| MD 26 B50635 | White | Chaupiwasi |
| MD 26 B506350 | White | Chaupiwasi |
| 93-13 | White | Oquemarca |
| 40-12 MD | White | Chaupiwasi |
| b1336 MD | White | Chaupiwasi |
| 5704 MD | White | Chaupiwasi |
| d40176 | White | Huaycho |
| CONEJA | White | Oquemarca |
| 62-130 | White | Oquemarca |
| 5346 MD | White | Oquemarca |
| 37-17 18 | White | Oquemarca |
| EQM22480 | White | Oquemarca |
| Huareño Suri | White | Oquemarca |
| 060-15 MD | White | Chaupiwasi |
| 269-13 MD | White | Chaupiwasi |
| 380064 | White | Chaupiwasi |
| 4598-MD | White | Chaupiwasi |
| 12113-MD | White | Chaupiwasi |
| B567-MD | White | Chaupiwasi |
| B1342-MD | White | Chaupiwasi |
| LAC | White | Oquemarca |
| B1336 | White | Oquemarca |
| XAVI | White | Oquemarca |
| 68-1211 | White | Oquemarca |
| PIEDRA | White | Oquemarca |
| B1341 | White | Oquemarca |
| 5610 | White | Huaycho |
| 5714 | White | Huaycho |
| 042-15 | White | Huaycho |
| 031-15 | White | Huaycho |
| 008-150 | White | Huaycho |
| CHINITA | White | Oquemarca |
| 62-13 | White | Oquemarca |
| B567 | White | Oquemarca |
| MD-65 | White | Chaupiwasi |
| MD-76 | White | Chaupiwasi |
| MD-63 | White | Chaupiwasi |
| B1342 | White | Chaupiwasi |
| ROSITA | White | Oquemarca |
| MD-31 | White | Chaupiwasi |
| MD-56 | White | Chaupiwasi |
| MD-66 | White | Chaupiwasi |
| MD-26 | White | Chaupiwasi |
| MD-35 | White | Chaupiwasi |
| JUNIOR PIEDRA | White | Oquemarca |
| MD-40 | White | Chaupiwasi |
| VENGADORA | White | Oquemarca |
| RITTI | White | Oquemarca |
| MD-27 | White | Chaupiwasi |
| MD-46 | White | Chaupiwasi |
| DINA | White | Oquemarca |
| MISTI | White | Oquemarca |
| RJ1034 | White | Oquemarca |
| Corriedale | White | Oquemarca |
| EQM | White | Oquemarca |
| 1014 | White | Oquemarca |
| MD-12 | White | Chaupiwasi |
| MD-41 | White | Chaupiwasi |
| MD-50 | White | Chaupiwasi |
| C.C | White | Oquemarca |
| MD-14 | White | Chaupiwasi |
| Estrella | White | Oquemarca |
| Oso | White | Oquemarca |
| Cucuchi | White | Oquemarca |
| Keña | White | Oquemarca |
| Hareño | White | Oquemarca |
| MD-51 | White | Oquemarca |
| Hugo | White | Oquemarca |
| MD-59 | White | Oquemarca |
| Churra | White | Oquemarca |
| 52 | White | Chaupiwasi |
| 1 | White | Chaupiwasi |
| 2 | White | Chaupiwasi |
| 3 | White | Chaupiwasi |
| 4-307 | White | Chaupiwasi |
| 5 | White | Chaupiwasi |
| H6604 | White | La Raya |
| H7066 | White | La Raya |
| H0382 | White | La Raya |
| H2323 | White | La Raya |
| H5588 | White | La Raya |
| H0879 | White | La Raya |
| H2754 | White | La Raya |
| H0433 | White | La Raya |
| H6376 | White | La Raya |
| H5641 | White | La Raya |
| H4100 | White | La Raya |
| H6692 | White | La Raya |
| 3estrella | White | Oquemarca |
| 7coneja | White | Oquemarca |
| 15 (1014) | White | Oquemarca |
| 51(EQM22580 | White | Oquemarca |
| 105 | White | Teresapampa |
| 187 | White | Teresapampa |
| 198 | White | Teresapampa |
| 112 | White | Teresapampa |
| 111 | White | Teresapampa |
| 159 | White | Teresapampa |
| 172 | White | Teresapampa |
| 104 | White | Teresapampa |
| 135 | White | Teresapampa |
| 127 | White | Teresapampa |
| RA2007UPH | White | La Raya |
| H4175 | White | La Raya |
| SR0080 | White | La Raya |
| H5686 | White | La Raya |
| S0172 | White | La Raya |
| H1003 2-06 | White | La Raya |
| H4490 2-11 | White | La Raya |
| 132 | White | Teresapampa |
| 100 | White | Teresapampa |
| 117 | White | Teresapampa |
| 185 | White | Teresapampa |
| 174 | White | Teresapampa |
| 156 | White | Teresapampa |
| 181 | White | Teresapampa |
| 152 | White | Teresapampa |
| 150 | White | Teresapampa |
| H5673 | White | La Raya |
| H4100 | White | La Raya |
| H4610 | White | La Raya |
| H4200 | White | La Raya |
| H6583 3-14 | White | La Raya |
| H5243 2-12 | White | La Raya |
| 38 |  | Huaycho |
| 52 | White | Huaycho |
| S0417 3-14 | White | La Raya |
| 42 | White | Huaycho |
| 58 | White | Huaycho |
| 74 | White | Huaycho |
| 29 | White | Huaycho |
| 56 | White | Huaycho |
| 39 | White | Huaycho |
| 77 | White | Huaycho |
| S0399 | White | La Raya |
| H4201 | White | La Raya |
| H5179 | White | La Raya |
| H4456 | White | La Raya |
| HR0016 | White | La Raya |
| HR0033 | White | La Raya |
| H3920 | White | La Raya |
| HR0081 | White | La Raya |
| H2072 | White | La Raya |
| HR0010 | White | La Raya |
| SURI BLANCO s/A | White | La Raya |
| H5592 | White | La Raya |
| H5272 | White | La Raya |
| HR0028 | White | La Raya |
| HR0035 | White | La Raya |
| H4025 | White | La Raya |
| H5752 | White | La Raya |
| H3165 11-09 | White | La Raya |
| **Sample ID** | **Coat color** | **Farmer** |
| tomasa016 | Black | Oquemarca |
| 2823 | Black | Oquemarca |
| 70(1044)desajustado | Black | Oquemarca |
| 64(2816)Pacocharaymi | Black | Oquemarca |
| 89 | Black | Oquemarca |
| H6494 | Black | La Raya |
| S0396 | Black | La Raya |
| H6329 | Black | La Raya |
| H5199 | Black | La Raya |
| 236-13 | Black | La Raya |
| 47-70 MD-37 | Black | Chaupiwasi |
| 027-15 MD-43 | Black | Chaupiwasi |
| 31 1043 niño | Black | Oquemarca |
| 60 BURRO SURI | Black | Oquemarca |
| 187-14 MD19 | Black | Chaupiwasi |
| 119-14 | Black | Chaupiwasi |
| 155-14 55-14 | Black | Chaupiwasi |
| B41209 MD54 | Black | Chaupiwasi |
| 5747 MD 61 | Black | Chaupiwasi |
| H4678 | Black | La Raya |
| H4676 | Black | La Raya |
| H5506 | Black | La Raya |
| SA1 | Black | Huaycho |
| SA2 | Black | Huaycho |
| SA3 | Black | Huaycho |
| SA4 | Black | Huaycho |
| SA5 | Black | Huaycho |
| SA6 | Black | Huaycho |
| SA7 | Black | Huaycho |
| SA8 | Black | Huaycho |
| SA9 | Black | Huaycho |
| SA10 | Black | Huaycho |
| SA11 | Black | Huaycho |
| SA12 | Black | Huaycho |
| SA13 | Black | Huaycho |
| SA14 | Black | Huaycho |
| SA15 | Black | Huaycho |
| SA16 | Black | Huaycho |
| SA17 | Black | Huaycho |
| SA18 | Black | Huaycho |
| SA19 | Black | Huaycho |
| SA20 | Black | Huaycho |
| SA21 | Black | Huaycho |
| SA22 | Black | Huaycho |
| SA23 | Black | Huaycho |
| SA24 | Black | Huaycho |
| SA25 | Black | Huaycho |
| SA26 | Black | Huaycho |
| SA27 | Black | Huaycho |
| SA28 | Black | Huaycho |
| SA29 | Black | Huaycho |
| SA30 | Black | Huaycho |
| SA31 | Black | Huaycho |
| SA32 | Black | Huaycho |
| SA33 | Black | Huaycho |
| SA34 | Black | Huaycho |
| SA35 | Black | Huaycho |
| SA36 | Black | Huaycho |
| 1 | Black | Teresapampa |
| 2 | Black | Teresapampa |
| 3 | Black | Teresapampa |
| 4 | Black | Teresapampa |
| 5 | Black | Teresapampa |
| 6 | Black | Teresapampa |
| 7 | Black | Teresapampa |
| 8 | Black | Teresapampa |
| 9 | Black | Teresapampa |
| 10 | Black | Teresapampa |
| 11 | Black | Teresapampa |
| 12 | Black | Teresapampa |
| 13 | Black | Teresapampa |
| 14 | Black | Teresapampa |
| 15 | Black | Teresapampa |
| 16 | Black | Teresapampa |
| 17 | Black | Teresapampa |
| 18 | Black | Teresapampa |
| 19 | Black | Teresapampa |
| 20 | Black | Teresapampa |
| 21 | Black | Teresapampa |
| 22 | Black | Teresapampa |
| 23 | Black | Teresapampa |
| 24 | Black | Teresapampa |
| 25 | Black | Teresapampa |
| 26 | Black | Teresapampa |
| 27 | Black | Teresapampa |
| 28 | Black | Teresapampa |
| 29 | Black | Teresapampa |
| 30 | Black | Teresapampa |
| **Sample ID** | **Coat color** | **Farmer** |
| 42(00610) | Brown | Oquemarca |
| 45hermana de osita | Brown | Oquemarca |
| 46 osita | Brown | Oquemarca |
| 47denisse | Brown | Oquemarca |
| 8 eliza | Brown | Oquemarca |
| 16513 | Brown | Oquemarca |
| B1271 | Brown | Oquemarca |
| 63 puca rumi1040 | Brown | Oquemarca |
| 62rojizo | Brown | Oquemarca |
| 612 | Brown | Oquemarca |
| 2821 vino | Brown | Oquemarca |
| 1030 | Brown | Oquemarca |
| 614 | Brown | Oquemarca |
| 1 | Brown | Teresapampa |
| 2 | Brown | Teresapampa |
| 3 | Brown | Teresapampa |
| 4 | Brown | Teresapampa |
| 5 | Brown | Teresapampa |
| 6 | Brown | Teresapampa |
| 7 | Brown | Teresapampa |
| 8 | Brown | Teresapampa |
| 9 | Brown | Teresapampa |
| 14 | Brown | Huaycho |
| 7 | Brown | Huaycho |
| 5446 | Brown | Huaycho |
| 296 | Brown | Huaycho |
| A-11 | Brown | Huaycho |
| H4523 03-11 | Brown | La Raya |
| 5752 MD-52 | Brown | Chaupiwasi |
| 31-14 MD-78 | Brown | Chaupiwasi |
| 261.14 MD-16 | Brown | Chaupiwasi |
| 5724 MD-25 | Brown | Chaupiwasi |
| 181-15 MD-44 | Brown | Chaupiwasi |
| 187-15 MD-74 | Brown | Chaupiwasi |
| 199-15 MD-49 | Brown | Chaupiwasi |
| 45 HERMANA OSO | Brown | Chaupiwasi |
| 47 015 | Brown | Chaupiwasi |
| 3-14 MD70 | Brown | Chaupiwasi |
| 31-14 MD20 | Brown | Chaupiwasi |
| H4661 | Brown | La Raya |
| H4259 | Brown | La Raya |
| H4650 | Brown | La Raya |
| H5761 | Brown | La Raya |
| HR0078 | Brown | La Raya |
| H5874 | Brown | La Raya |
| S0287 | Brown | La Raya |
| H5265 | Brown | La Raya |
| H4711 | Brown | La Raya |
| H5513 | Brown | La Raya |
| S0290 | Brown | La Raya |
| HR0049 | Brown | La Raya |
| H4715 | Brown | La Raya |
| H5730 | Brown | La Raya |
| HR0079 | Brown | La Raya |
| S0263 | Brown | La Raya |
| H5032 | Brown | La Raya |
| H5072 | Brown | La Raya |
| H5201 | Brown | La Raya |
| **Sample ID** | **Coat color** | **Farmer** |
| 74(nuevo) | Gray | Oquemarca |
| 67(1032)API | Gray | Oquemarca |
| Nuevo | Gray | Oquemarca |
| 74 | Gray | Oquemarca |
| 4893 MD-24 | Gray | Chaupiwasi |
| 4493 MD-39 | Gray | Chaupiwasi |
| 136-15 MD-73 | Gray | Chaupiwasi |
| 73 SURI GRIS NUEVO | Gray | Chaupiwasi |
| 27-10 15 | Gray | La Raya |
| 104-14 MD-64 | Gray | Chaupiwasi |
| 1013 MD36 2170 | Gray | Chaupiwasi |
| 197-14 | Gray | La Raya |
| S0275 | Gray | La Raya |
| S0298 | Gray | La Raya |
| H6524 | Gray | La Raya |
| S0338 | Gray | La Raya |
| 4776 MD-34 | Gray | Chaupiwasi |
| 2170 MD28 | Gray | Chaupiwasi |
| SA1 | Gray | Huaycho |
| SA2 | Gray | Huaycho |
| SA3 | Gray | Huaycho |
| SA4 | Gray | Huaycho |
| SA5 | Gray | Huaycho |
| SA6 | Gray | Huaycho |
| SA7 | Gray | Huaycho |
| SA8 | Gray | Huaycho |
| SA9 | Gray | Huaycho |
| SA10 | Gray | Huaycho |
| SA11 | Gray | Huaycho |
| SA12 | Gray | Huaycho |
| SA13 | Gray | Huaycho |
| SA14 | Gray | Huaycho |
| SA15 | Gray | Huaycho |
| SA16 | Gray | Huaycho |
| SA17 | Gray | Huaycho |
| SA18 | Gray | Huaycho |
| SA19 | Gray | Huaycho |
| SA20 | Gray | Huaycho |
| SA21 | Gray | Huaycho |
| SA22 | Gray | Huaycho |
| SA23 | Gray | Huaycho |
| SA24 | Gray | Huaycho |
| SA25 | Gray | Huaycho |
| SA26 | Gray | Huaycho |
| SA27 | Gray | Huaycho |
| SA28 | Gray | Huaycho |
| SA29 | Gray | Huaycho |
| SA30 | Gray | Huaycho |
| SA31 | Gray | Huaycho |
| SA32 | Gray | Huaycho |
| SA33 | Gray | Huaycho |
| SA34 | Gray | Huaycho |
| SA35 | Gray | Huaycho |
| SA36 | Gray | Huaycho |
| SA37 | Gray | Huaycho |
| SA38 | Gray | Huaycho |
| SA39 | Gray | Huaycho |
| SA40 | Gray | Huaycho |
| SA41 | Gray | Huaycho |
| SA42 | Gray | Huaycho |
| SA43 | Gray | Huaycho |
| SA44 | Gray | Huaycho |
| SA45 | Gray | Huaycho |
| SA46 | Gray | Huaycho |
| SA47 | Gray | Huaycho |
| SA48 | Gray | Huaycho |
| SA49 | Gray | Huaycho |
| SA50 | Gray | Huaycho |
| SA51 | Gray | Huaycho |
| SA52 | Gray | Huaycho |
| SA53 | Gray | Huaycho |
| SA54 | Gray | Huaycho |
| SA55 | Gray | Huaycho |
| SA56 | Gray | Huaycho |
| SA57 | Gray | Huaycho |
| SA58 | Gray | Huaycho |
| SA59 | Gray | Huaycho |
| SA60 | Gray | Huaycho |
| SA61 | Gray | Huaycho |
| SA62 | Gray | Huaycho |
| SA63 | Gray | Huaycho |
| SA64 | Gray | Huaycho |
| SA65 | Gray | Huaycho |
| SA66 | Gray | Huaycho |
| SA67 | Gray | Huaycho |
| SA68 | Gray | Huaycho |
| SA69 | Gray | Huaycho |
| SA70 | Gray | Huaycho |
| SA71 | Gray | Huaycho |
| **Sample ID** | **Coat color** | **Farmer** |
| 16(2824) | LF | Oquemarca |
| 22(2705) | LF | Oquemarca |
| 57 | LF | Oquemarca |
| 005sarita | LF | Oquemarca |
| LF2819 | LF | Oquemarca |
| 2824 | LF | Oquemarca |
| 61(1046) | LF | Oquemarca |
| 2826 champang | LF | Oquemarca |
| 2829 amigo | LF | Oquemarca |
| 2705 | LF | Oquemarca |
| campeonita | LF | Oquemarca |
| 55-14 MD-71 | LF | Chaupiwasi |
| 45-14 MD-68 | LF | Chaupiwasi |
| 118-14 MD-53 | LF | Chaupiwasi |
| 57 | LF | Oquemarca |
| H2177 | LF | La Raya |
